# Supplementary material for: Oxidative Stress and Inflammatory Markers in Abdominal Aortic Aneurysm
Source: PubMed Central journal article supplement (PMC8070751; doi:10.3390/antiox10040602), 2021-04-14
Supplement: antioxidants-10-00602-s001.pdf [file antioxidants-10-00602-s001.pdf]

## SUPPLEMENTARY MATERIAL

### **Oxidative stress and inflammatory markers in abdominal aortic aneurysm.**

*Running title:* Novel markers for AAA

Authors: David Sánchez-Infantes<sup>1,2</sup>, Meritxell Nus<sup>3,4</sup>, Miquel Navas-Madroñal<sup>5,6</sup>, Joan Fité<sup>7</sup>, Belén Pérez<sup>8</sup>, Antonio J. Barros-Membrilla<sup>9</sup>, Begoña Soto<sup>7</sup>, José Martínez-González<sup>4,10</sup>, Mercedes Camacho<sup>4,5,6</sup>, Cristina Rodríguez<sup>4,5,6</sup>, Ziad Mallat<sup>3</sup>, María Galán<sup>4,5,6</sup>.

<sup>1</sup>Department of Basic Sciences of Health, Area of Biochemistry and Molecular Biology, University Rey Juan Carlos , Alcorcón, Spain.

<sup>2</sup>Centro de Investigación Biomédica en Red-Fisiopatología de la Obesidad y Nutrición (CIBEROBN), ISCIII, Madrid, Spain.

<sup>3</sup>Division of Cardiovascular Medicine, University of Cambridge. Cambridge, United Kingdom.

<sup>4</sup>Centro de Investigación en Red de Enfermedades Cardiovasculares (CIBERCV), Madrid, Spain.

<sup>5</sup>Institut de Recerca del Hospital de la Santa Creu i Sant Pau, Barcelona, Spain. 08041.

<sup>6</sup>Instituto de Investigación Biomédica Sant Pau (IB Sant Pau), Barcelona, Spain.

<sup>7</sup>Servicio de Angiología, Cirugía Vascular y Endovascular, Hospital de la Santa Creu i Sant Pau. Barcelona, Spain.

<sup>8</sup>Faculty of Medicine, Universidad Autónoma de Barcelona, Bellaterra. Barcelona, Spain.

<sup>9</sup>Unidad Funcional de Patología de la Aorta (UPA), Servicio de Cardiología, Hospital de la Santa Creu i Sant Pau. Barcelona, Spain.

<sup>10</sup>Instituto de Investigaciones Biomédicas de Barcelona (IIBB-CSIC), IIB Sant Pau, Barcelona, Spain.

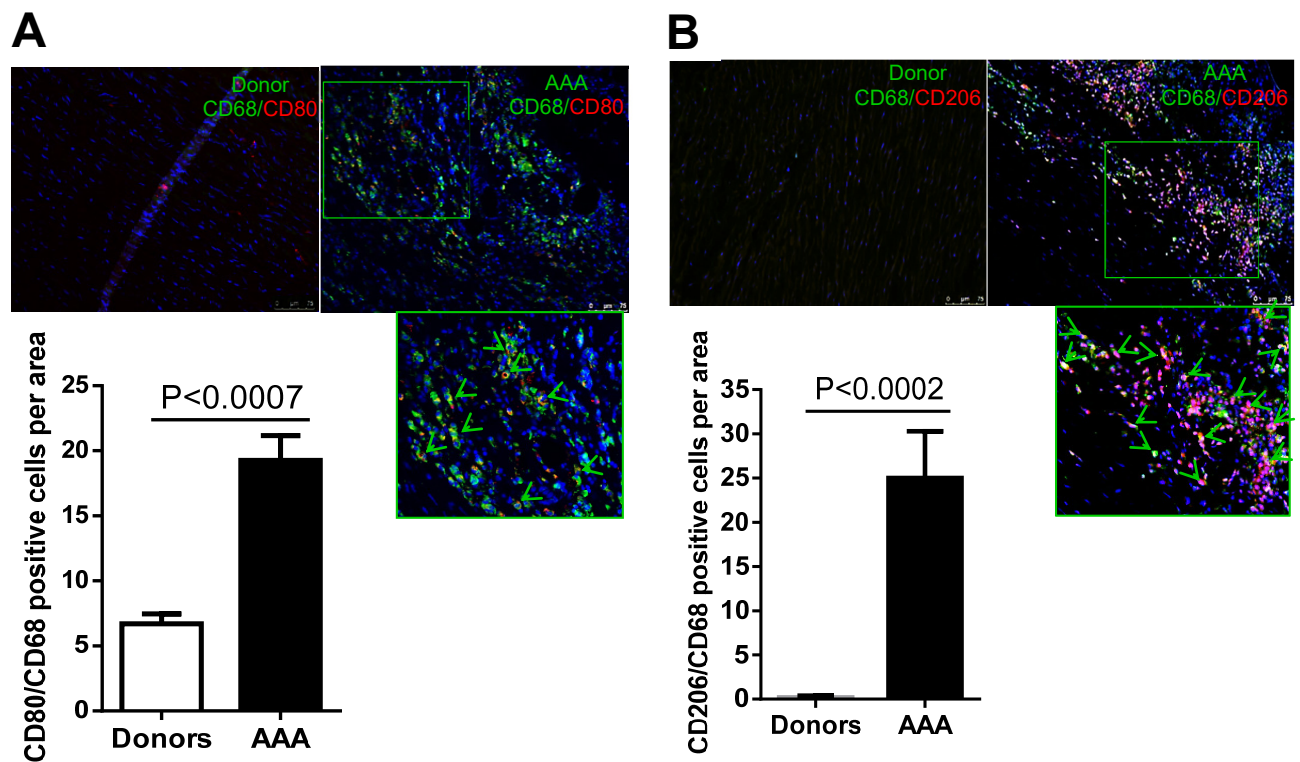

**Figure Supplementary 1. Presence of M1 and M2 infiltrated macrophages in AAA tissue.** A-B) Representative images of immunostaining assays performed in abdominal aorta sections from donors and AAA patients targeting M1 (CD68 CD80) and M2 (CD68 CD206) macrophages (n=10). The histograms below show

the quantification of the number of positive cells per aortic area (10x). Results are expressed as mean  $\pm$  SEM.

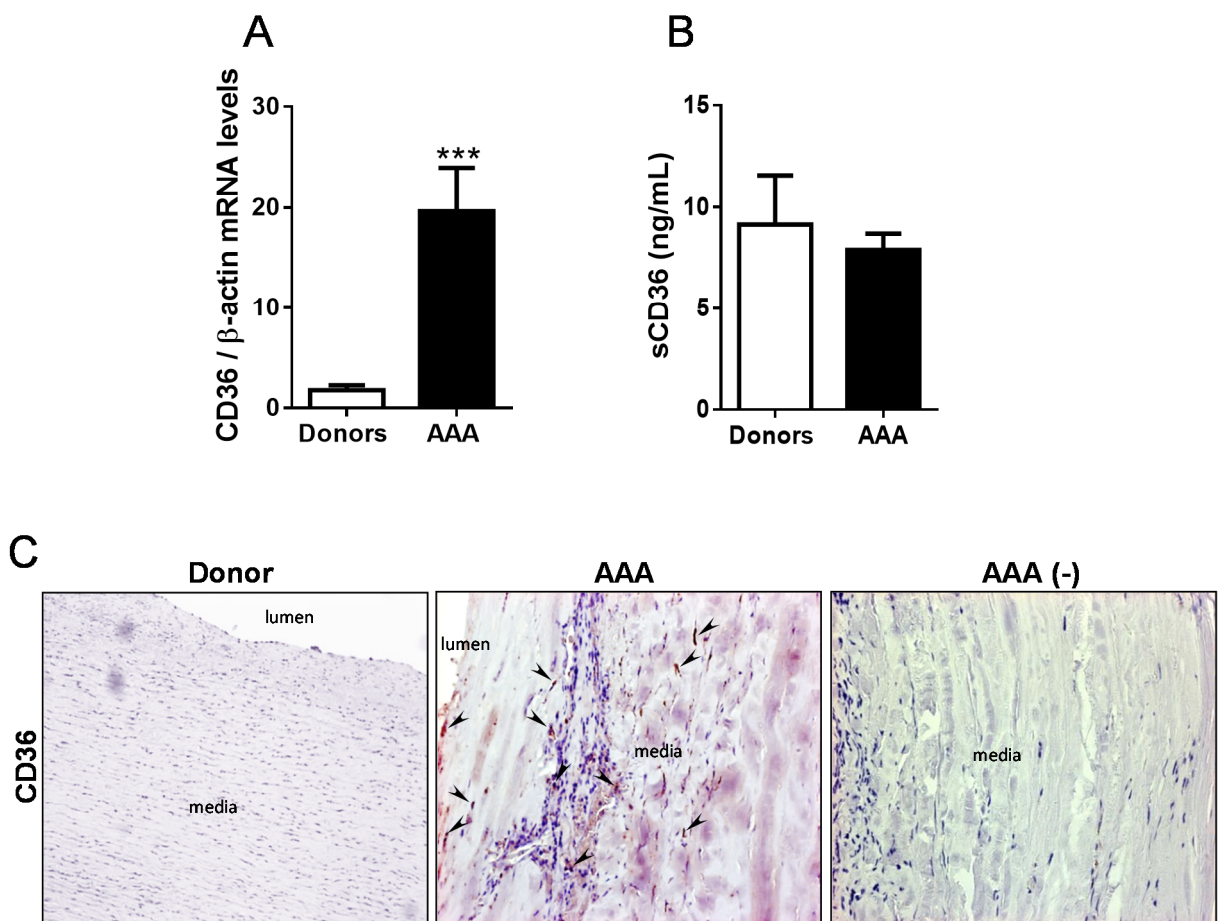

**Figure Supplementary 2. CD36 protein is increased in aneurysmal tissue but not in the circulation.** **A)** Human abdominal aortic mRNA levels of CD36 measured by quantitative real Time PCR analysis and normalized to  $\beta$ -actin in healthy donors (n=15) and patients (AAA) (n=80); **B)** Plasma levels of CD36 in AAA (n=32) vs healthy donors (n=21); **C)** Representative images of immunostaining assays performed in abdominal aorta sections from donors and AAA patients targeting CD36 (n=10; Scale bars: 100  $\mu$ m). Arrows indicate the positively stained cells. AAA (-) indicates negative control for immunohistochemistry. Results are expressed as mean  $\pm$  SEM. \*\*\*  $p < 0.001$  vs. AAA.

**Supplementary Table S1. Logistic regression analysis.**

|                          | Covariate  | OR     | 95 % C.I. for EXP (B) |         | P value   |
|--------------------------|------------|--------|-----------------------|---------|-----------|
|                          |            |        | Lower                 | Upper   |           |
| Unadjusted               | <b>IgG</b> | 28.007 | 7.529                 | 104.187 | < 0.0001* |
| Adjusted for age         |            | 20.863 | 3.719                 | 117.028 | 0.00045*  |
| Adjusted for sex         |            | 27.185 | 7.211                 | 102.483 | < 0.0001* |
| Adjusted for HTA         |            | 12.861 | 3.206                 | 51.589  | < 0.0001* |
| Adjusted for DM          |            | 28.696 | 7.581                 | 108.625 | < 0.0001* |
| Adjusted for smoking     |            | 25.944 | 6.443                 | 104.467 | < 0.0001* |
| Adjusted for all factors |            | 8.221  | 0.670                 | 100.951 | 0.043*    |
| Unadjusted               | <b>IgM</b> | 0.096  | 0.020                 | 0.454   | 0.003*    |
| Adjusted for age         |            | 0.018  | 0.001                 | 0.254   | 0.004*    |
| Adjusted for sex         |            | 0.097  | 0.020                 | 0.478   | 0.004*    |
| Adjusted for HTA         |            | 0.143  | 0.021                 | 0.987   | 0.048*    |
| Adjusted for DM          |            | 0.1    | 0.021                 | 0.987   | 0.004*    |
| Adjusted for smoking     |            | 0.068  | 0.012                 | 0.408   | 0.003*    |
| Adjusted for all factors |            | 0.008  | 0.0001                | 0.578   | 0.027*    |

|                          |               |        |       |        |           |
|--------------------------|---------------|--------|-------|--------|-----------|
| Unadjusted               | <b>ROS</b>    | 1.314  | 1.168 | 1.466  | < 0.0001* |
| Adjusted for age         |               | 1.816  | 0.999 | 3.301  | 0.050*    |
| Adjusted for sex         |               | 1.376  | 1.197 | 1.582  | < 0.0001* |
| Adjusted for HTA         |               | 1.495  | 1.137 | 1.966  | 0.004*    |
| Adjusted for DM          |               | 1.324  | 1.179 | 1.488  | < 0.0001* |
| Adjusted for smoking     |               | 1.348  | 1.180 | 1.540  | < 0.0001* |
| Adjusted for all factors |               | 1.708  | 1.012 | 2.884  | 0.989     |
| Unadjusted               | <b>CD38</b>   | 6.447  | 2.201 | 18.885 | 0.001*    |
| Adjusted for age         |               | 6.927  | 2.058 | 23.315 | 0.002*    |
| Adjusted for sex         |               | 6.617  | 2.247 | 19.485 | 0.001*    |
| Adjusted for HTA         |               | 6.361  | 1.850 | 21.879 | 0.003*    |
| Adjusted for DM          |               | 6.619  | 2.205 | 19.869 | 0.001*    |
| Adjusted for smoking     |               | 7.188  | 2.274 | 22.728 | 0.001*    |
| Adjusted for all factors |               | 10.119 | 1.813 | 56.485 | 0.008*    |
| Unadjusted               | <b>GDF15</b>  | 24.653 | 9.215 | 65.957 | < 0.0001* |
| Adjusted for age         |               | 13.755 | 4.587 | 41.248 | < 0.0001* |
| Adjusted for sex         |               | 20.749 | 7.696 | 55.942 | < 0.0001* |
| Adjusted for HTA         |               | 18.903 | 6.239 | 57.275 | < 0.0001* |
| Adjusted for DM          |               | 24.721 | 9.191 | 66.490 | < 0.0001* |
| Adjusted for smoking     |               | 24.608 | 8.653 | 69.982 | < 0.0001* |
| Adjusted for all factors |               | 5.793  | 1.767 | 18.993 | 0.004*    |
| Unadjusted               | <b>S100A4</b> | 0.093  | 0.025 | 0.344  | 0.0004*   |
| Adjusted for age         |               | 0.094  | 0.020 | 0.350  | 0.020*    |
| Adjusted for sex         |               | 0.091  | 0.024 | 0.350  | 0.0005*   |
| Adjusted for HTA         |               | 0.114  | 0.025 | 0.521  | 0.005*    |
| Adjusted for DM          |               | 0.094  | 0.025 | 0.350  | 0.0004*   |
| Adjusted for smoking     |               | 0.079  | 0.018 | 0.341  | 0.001*    |
| Adjusted for all factors |               | 0.112  | 0.007 | 1.747  | 0.118     |

OR: Odd Ratio; 95% CI: 95 confidence interval. \*P<0.05 vs. Donors: statistically significant.
